# Supplementary material for: Genomic insights into methicillin-resistant Staphylococcus pseudintermedius isolates from dogs and humans of the same sequence types reveals diversity in prophages and pathogenicity islands
Source: PubMed Central journal article supplement (PMC8297860; doi:10.1371/journal.pone.0254382), 2021-07-22
Supplement: pone.0254382.s001.pdf [file pone.0254382.s001.pdf]

## Supporting information

**S1 Table.** Primer lists used in this study

| Gene         | Prophage and PI | Primer name | Oligonucleotide sequence (5'-3') | Product size (bp) |
|--------------|-----------------|-------------|----------------------------------|-------------------|
| <i>int-1</i> | VB16-Pro1       | int1-F      | TGACCACTCCACCGAAAGTG             | 258               |
|              |                 | int1-R      | TCACCGAATCTCCCTCCTGT             |                   |
| <i>int-2</i> | AH18-Pro1       | int2-F      | GAGGTAGTAAGCCGTCACGT             | 552               |
|              |                 | int1-R      | TGACACGTTGACCTTGCTCT             |                   |
| <i>int-3</i> | VB88-Pro2       | int3-F      | AGACAATAGTGACCTGCGGC             | 486               |
|              |                 | int1-R      | GGCCGAGGGTATATTGACCG             |                   |
| <i>int-4</i> | VB16-Pro3       | int4-F      | ACGAACAAAGTTTACGCGGC             | 404               |
|              |                 | int1-R      | TTTTTGAGCAGCTGCACGTC             |                   |
| <i>int-5</i> | AI14-Pro1       | int5-F      | GGCGCTTGCAACTACGTAAC             | 257               |
|              |                 | int1-R      | CACATGTCCTACACGCTCCA             |                   |
| <i>int-6</i> | AK9-Pro1        | int6-F      | AGACACGTTTGGCAGAATTGA            | 492               |
|              |                 | int1-R      | TTACGTGGCCGCACATACTT             |                   |
| <i>int-7</i> | AP20-PI1        | int7-F      | ACGGAACAATACACTGGCGT             | 413               |
|              |                 | int1-R      | CATTTGCTCGGTTACGTGGC             |                   |
| <i>int-8</i> | AP20-PI2        | int8-F      | GACGGGGCTTCAAGACTGAA             | 522               |
|              |                 | int1-R      | CGCCACGTCTAAAGCCAGTA             |                   |
| <i>spsO</i>  | VB88-ST45       | spsO-F      | GCGCCGATCCTACAGTAGTT             | 850               |
|              |                 | spsO-R      | GGGGCTATTGCGATGTCGAT             |                   |
