# Supplementary material for: Genomic insights into methicillin-resistant Staphylococcus pseudintermedius isolates from dogs and humans of the same sequence types reveals diversity in prophages and pathogenicity islands
Source: PubMed Central journal article supplement (PMC8297860; doi:10.1371/journal.pone.0254382), 2021-07-22
Supplement: pone.0254382.s002.pdf [file pone.0254382.s002.pdf]

## Supporting information

**S2 Table.** Unique genes of human isolates predicted from Roary

| Gene name            | Putative function                               | Size (bp)                                                | Location    |             |             |
|----------------------|-------------------------------------------------|----------------------------------------------------------|-------------|-------------|-------------|
|                      |                                                 |                                                          | VB88-ST45   | VB16- ST112 | AP20-ST181  |
| integrase            | Phage integrase                                 | 1052                                                     | φ VB88-Pro1 | φ VB16-Pro1 | φ AP20-Pro1 |
| amidase              | Phage lysin, N-acetylmuramoyl-L-alanine amidase | 1460                                                     | φ VB88-Pro1 | φ VB16-Pro1 | φ AP20-Pro1 |
|                      | Phage protein                                   | 249                                                      | φ VB88-Pro1 | φ VB16-Pro1 | φ AP20-Pro1 |
| hypothetical protein | -                                               | 167                                                      | φ VB88-Pro2 | φ VB16-Pro3 | φ AP20-Pro1 |
| hypothetical protein | -                                               | 177                                                      | φ VB88-Pro2 | φ VB16-Pro2 | φ AP20-Pro1 |
| hypothetical protein | -                                               | 152                                                      | φ VB88-Pro2 | φ VB16-Pro1 | φ AP20-Pro1 |
| hypothetical protein | -                                               | 350                                                      | φ VB88-Pro2 | φ VB16-Pro1 | φ AP20-Pro1 |
| hypothetical protein | -                                               | 335                                                      | φ VB88-Pro2 | φ VB16-Pro1 | φ AP20-Pro1 |
| <i>spsJ</i>          | LPXTG-motif cell wall anchor domain protein     | VB88-ST45=3,660<br>VB16- ST112=3,660<br>AP20-ST181=3,179 |             |             |             |
