# Supplementary material for: Genomic insights into methicillin-resistant Staphylococcus pseudintermedius isolates from dogs and humans of the same sequence types reveals diversity in prophages and pathogenicity islands
Source: PubMed Central journal article supplement (PMC8297860; doi:10.1371/journal.pone.0254382), 2021-07-22
Supplement: pone.0254382.s003.pdf [file pone.0254382.s003.pdf]

## Supporting information

**S3 Table.** Information of prophages found in this study

| Prophage    | Size (bp) | %GC content | Putative <i>att</i> sequence (no.)                                                                                                                         | Integration site                  |                                        |
|-------------|-----------|-------------|------------------------------------------------------------------------------------------------------------------------------------------------------------|-----------------------------------|----------------------------------------|
|             |           |             |                                                                                                                                                            | (Left)                            | (right)                                |
| φ VB88-Pro1 | 51,755    | 35.1        | CATATCAA (8)                                                                                                                                               | Phosphoglycerate kinase           | tRNA cluster                           |
| φ VB88-Pro2 | 40,400    | 35.8        | TGATACCGTTTT (12) <sup>a</sup>                                                                                                                             | Fe-S cluster, SufB                | Protease                               |
| φ AK9-Pro1  | 116,327   | 32.3        | TATCTTTCTACTTCTACCATGAC<br>AAATGCTTCAATAATATCGCCTT<br>CTTTAATATCATTGAATTTTCGCTA<br>CTGTGATACCACATTCGTAACCTT<br>GTGCAACTTCTTTCACATCGTCTT<br>TGAAACGTT (127) | Hypothetical protein              | Translation initiation factor 2 (IF-2) |
| φ VB16-Pro1 | 48,449    | 36.6        | N/A <sup>b</sup>                                                                                                                                           | tRNA cluster                      | Phosphoglycerate kinase                |
| φ VB16-Pro2 | 42,902    | 35.8        | AAAACGGTATCA (12) <sup>a</sup>                                                                                                                             | Protease                          | Fe-S cluster, SufB                     |
| φ VB16-Pro3 | 42,674    | 37.1        | N/A <sup>b</sup>                                                                                                                                           | Putative sodium:sulfate symporter | Putative sodium:sulfate symporter      |
| φ AI14-Pro1 | 45,039    | 34.1        | GGGCAAAAAAAGGGCAG (17) <sup>a</sup>                                                                                                                        | Late competence protein ComGA     | Late competence protein ComGA          |
| φ AP20-Pro1 | 48,202    | 35.2        | TTGATATG (8)                                                                                                                                               | tRNA cluster                      | Phosphoglycerate kinase                |

<sup>a</sup> *att* sequence predicted from PHASTER; <sup>b</sup> N/A, not available
